# Supplementary material
Source: PubMed Central journal article supplement (PMC5440020)
Supplement: DB161075SupplementaryData.pdf [file DB161075SupplementaryData.pdf]

SUPPLEMENTARY DATA

**Supplementary Table 1.** Body weight and body composition were examined in male wild-type (WT), control (CON: GLUT4 LoxP<sup>+/-</sup>, GLUT4 LoxP<sup>+/+</sup> and Cre<sup>+</sup>), muscle-specific GLUT4 heterozygous (mGLUT4 HET) and muscle-specific GLUT4 knockout (mGLUT4 KO) mice at 11-12 weeks old. Plantaris muscle hypertrophy was induced by unilateral synergist ablation of the distal two-thirds of the gastrocnemius and soleus muscles. The contralateral limb was sham-operated and served as the control. After 5 days, plantaris muscles were excised and weighed. Statistical significance was defined as P<0.05 and denoted by ‘a’ vs sham, and ‘b’ vs WT/CON. N=8-17 mice or muscles/ group.

| Genotype                                                    | WT/CON                     | mGLUT4 HET                  | mGLUT4 KO                  |
|-------------------------------------------------------------|----------------------------|-----------------------------|----------------------------|
| <b>Pre-Surgery Body Weight – Fed State (g)</b>              | 28.9 ± 0.7                 | 30.6 ± 0.6                  | 28.1 ± 0.8                 |
| <b>Body Composition – Fat Mass (g)</b>                      | 4.6 ± 0.2                  | 5.5 ± 0.5                   | 4.2 ± 0.7                  |
| – Lean Mass (g)                                             | 21.1 ± 0.6                 | 21.7 ± 0.5                  | 20.8 ± 0.5                 |
| – Fat Mass (%)                                              | 15.9 ± 0.7                 | 18.0 ± 1.5                  | 14.5 ± 2.0                 |
| – Lean Mass (%)                                             | 72.7 ± 0.8                 | 71.0 ± 1.4                  | 74.2 ± 1.7                 |
| <b>Pre-Tissue Collection Body Weight – Fasted State (g)</b> | 25.8 ± 0.7                 | 26.7 ± 0.7                  | 24.4 ± 0.8                 |
| <b>Plantaris Muscle Wt – Sham (mg)</b>                      | 17.2 ± 0.4                 | 16.6 ± 0.6                  | 16.4 ± 0.5                 |
| – Overload (mg)                                             | 23.8 ± 0.8 <sup>a</sup>    | 22.4 ± 1.0 <sup>a</sup>     | 22.1 ± 0.5 <sup>a</sup>    |
| <b>Plantaris Muscle Wt : Body Wt – Sham (mg/g)</b>          | 0.677 ± 0.011              | 0.621 ± 0.017               | 0.675 ± 0.023              |
| – Overload (mg/g)                                           | 0.940 ± 0.027 <sup>a</sup> | 0.840 ± 0.039 <sup>ab</sup> | 0.909 ± 0.024 <sup>a</sup> |
| <b>Percent Change in Muscle Wt (%)</b>                      | 38.8 ± 3.6                 | 35.0 ± 3.5                  | 35.2 ± 3.2                 |

SUPPLEMENTARY DATA

**Supplementary Table 2. Characteristics of Mice and Skeletal Muscles from Phloridzin Inhibitor Experiments.** Plantaris muscle hypertrophy was induced in female CD-1 mice by unilateral synergist ablation of the distal two-thirds of the gastrocnemius and soleus muscles. The contralateral limb was sham-operated and served as the control. After 5 days, mice were weighed, and plantaris muscles were excised and weighed. Statistical significance was defined as  $P < 0.05$  and denoted by 'a' vs sham.  $N = 6$  mice or muscles/group.

| Treatment                                             | EtOH (0.1%)                                         | Phloridzin (10 $\mu\text{mol/L}$ )                  | Phloridzin (100 $\mu\text{mol/L}$ )                 |
|-------------------------------------------------------|-----------------------------------------------------|-----------------------------------------------------|-----------------------------------------------------|
| Body Wt (g)                                           | 23.3 $\pm$ 0.5                                      | 22.9 $\pm$ 0.6                                      | 23.5 $\pm$ 0.3                                      |
| Plantaris Muscle Wt - Sham (mg)<br>- Overload (mg)    | 11.6 $\pm$ 0.5<br>24.0 $\pm$ 0.8 <sup>a</sup>       | 10.2 $\pm$ 0.5<br>22.4 $\pm$ 1.5 <sup>a</sup>       | 10.2 $\pm$ 0.5<br>22.1 $\pm$ 1.1 <sup>a</sup>       |
| Muscle Wt :Body Wt - Sham (mg/g)<br>- Overload (mg/g) | 0.501 $\pm$ 0.026<br>1.031 $\pm$ 0.047 <sup>a</sup> | 0.434 $\pm$ 0.024<br>0.969 $\pm$ 0.081 <sup>a</sup> | 0.429 $\pm$ 0.022<br>0.939 $\pm$ 0.054 <sup>a</sup> |
| Percent Change in Muscle Weight (%)                   | 108.2 $\pm$ 11.0                                    | 120.1 $\pm$ 22.8                                    | 118.9 $\pm$ 14.0                                    |

SUPPLEMENTARY DATA

**Supplementary Table 3. Characteristics of Mice and Skeletal Muscles from Cytochalasin B Inhibitor Experiments.** Plantaris muscle hypertrophy was induced in female CD-1 mice by unilateral synergist ablation of the distal two-thirds of the gastrocnemius and soleus muscles. The contralateral limb was sham-operated and served as the control. After 5 days, mice were weighed, and plantaris muscles were excised and weighed. Statistical significance was defined as  $P < 0.05$  and denoted by 'a' vs sham.  $N = 5$  mice or muscles/group.

| Treatment                                             | DMSO<br>(0.2%)                                      | Cytochalasin B<br>(10 $\mu$ mol/L)                  |
|-------------------------------------------------------|-----------------------------------------------------|-----------------------------------------------------|
| Body Wt (g)                                           | 26.1 $\pm$ 1.2                                      | 26.9 $\pm$ 1.0                                      |
| Plantaris Muscle Wt - Sham (mg)<br>- Overload (mg)    | 13.8 $\pm$ 0.4<br>19.8 $\pm$ 1.0 <sup>a</sup>       | 13.9 $\pm$ 0.3<br>20.0 $\pm$ 0.9 <sup>a</sup>       |
| Muscle Wt :Body Wt - Sham (mg/g)<br>- Overload (mg/g) | 0.532 $\pm$ 0.035<br>0.766 $\pm$ 0.054 <sup>a</sup> | 0.521 $\pm$ 0.024<br>0.747 $\pm$ 0.020 <sup>a</sup> |
| Percent Change in Muscle Weight (%)                   | 44.1 $\pm$ 5.2                                      | 44.3 $\pm$ 7.0                                      |

SUPPLEMENTARY DATA

**Supplementary Table 4A. Characteristics of Mice and Skeletal Muscles from Sugar Competition Experiment 1.** Plantaris muscle hypertrophy was induced in female CD-1 mice by unilateral synergist ablation of the distal two-thirds of the gastrocnemius and soleus muscles. The contralateral limb was sham-operated and served as the control. After 5 days, mice were weighed, and plantaris muscles were excised and weighed. Statistical significance was defined as  $P < 0.05$  and denoted by 'a' vs sham.  $N = 4$  mice or muscles/group.

| Treatment                                             | L-glucose<br>(35 mM)                        | D-Glucose<br>(35 mM)                        | D-Fructose<br>(35 mM)                       | D-Galactose<br>(35 mM)                      |
|-------------------------------------------------------|---------------------------------------------|---------------------------------------------|---------------------------------------------|---------------------------------------------|
| Body Wt (g)                                           | 23.9 ± 0.9                                  | 24.8 ± 0.5                                  | 24.3 ± 0.9                                  | 23.8 ± 0.3                                  |
| Plantaris Muscle Wt - Sham (mg)<br>- Overload (mg)    | 13.3 ± 0.5<br>20.9 ± 1.0 <sup>a</sup>       | 13.3 ± 0.4<br>20.2 ± 1.8 <sup>a</sup>       | 12.8 ± 0.7<br>20.5 ± 1.8 <sup>a</sup>       | 13.0 ± 0.7<br>19.2 ± 1.5 <sup>a</sup>       |
| Muscle Wt :Body Wt - Sham (mg/g)<br>- Overload (mg/g) | 0.559 ± 0.019<br>0.880 ± 0.051 <sup>a</sup> | 0.535 ± 0.010<br>0.811 ± 0.069 <sup>a</sup> | 0.532 ± 0.045<br>0.856 ± 0.101 <sup>a</sup> | 0.544 ± 0.025<br>0.808 ± 0.062 <sup>a</sup> |
| Percent Change in Muscle Weight (%)                   | 56.9 ± 4.2                                  | 51.2 ± 10.7                                 | 59.4 ± 6.8                                  | 50.5 ± 17.3                                 |

SUPPLEMENTARY DATA

**Supplementary Table 4B. Characteristics of Mice and Skeletal Muscles from Sugar Competition Experiment 2.** Plantaris muscle hypertrophy was induced in female CD-1 mice by unilateral synergist ablation of the distal two-thirds of the gastrocnemius and soleus muscles. The contralateral limb was sham-operated and served as the control. After 5 days, mice were weighed, and plantaris muscles were excised and weighed. Statistical significance was defined as  $P < 0.05$  and denoted by 'a' vs sham.  $N = 6$  mice or muscles/group.

| Treatment                                             | L-glucose<br>(35 mM)                        | D-Xylose<br>(35 mM)                         |
|-------------------------------------------------------|---------------------------------------------|---------------------------------------------|
| Body Wt (g)                                           | 22.5 ± 0.3                                  | 22.3 ± 0.5                                  |
| Plantaris Muscle Wt - Sham (mg)<br>- Overload (mg)    | 11.8 ± 0.4<br>16.3 ± 1.3 <sup>a</sup>       | 12.1 ± 0.4<br>18.0 ± 0.8 <sup>a</sup>       |
| Muscle Wt :Body Wt - Sham (mg/g)<br>- Overload (mg/g) | 0.523 ± 0.017<br>0.726 ± 0.060 <sup>a</sup> | 0.544 ± 0.018<br>0.811 ± 0.051 <sup>a</sup> |
| Percent Change in Muscle Weight (%)                   | 38.5 ± 9.9                                  | 50.3 ± 11.6                                 |

SUPPLEMENTARY DATA

**Supplementary Table 5. Characteristics of Mice and Skeletal Muscles from Overload Time Course Experiments.** In female wild-type CD-1 mice at 6-8 weeks old, plantaris muscle hypertrophy was induced by unilateral synergist ablation of the distal two-thirds of the gastrocnemius and soleus muscles. The contralateral limb was sham-operated and served as the control. After 1, 3, and 5 days, plantaris muscles were excised and weighed. Statistical significance was defined as  $P < 0.05$  and denoted by 'a' vs sham, and 'b' vs Day 1, 'c' vs Day 3.  $N = 6-7$  mice or muscles/group.

| Treatment                                             | Day 1                                   | Day 3                                   | Day 5                                     |
|-------------------------------------------------------|-----------------------------------------|-----------------------------------------|-------------------------------------------|
| Body Weight (g)                                       | 26.6 ± 0.5                              | 28.6 ± 0.8                              | 27.6 ± 0.9                                |
| Plantaris Muscle Wt – Sham (mg)<br>Overload (mg)      | 12.9 ± 0.2<br>16.4 ± 0.6 <sup>a</sup>   | 12.6 ± 0.6<br>18.1 ± 1.0 <sup>a</sup>   | 13.1 ± 0.7<br>23.9 ± 1.7 <sup>abc</sup>   |
| Muscle Wt :Body Wt - Sham (mg/g)<br>- Overload (mg/g) | 0.49 ± 0.01<br>0.62 ± 0.03 <sup>a</sup> | 0.44 ± 0.02<br>0.63 ± 0.03 <sup>a</sup> | 0.47 ± 0.01<br>0.88 ± 0.08 <sup>abc</sup> |
| Percent Change in Muscle Wt (%)                       | 27.0 ± 4.5                              | 43.3 ± 2.2                              | 86.1 ± 19.3 <sup>bc</sup>                 |

SUPPLEMENTARY DATA

**Supplementary Figure 1. Muscle-specific loss of GLUT4 does not impair overload-induced skeletal muscle glucose uptake in male mice.** At 11-12 wks old, male wild-type/control (WT/CON), muscle-specific GLUT4 heterozygous (mGLUT4 HET), and muscle-specific GLUT4 knockout (mGLUT4 KO) mice underwent unilateral synergist ablation surgery to induce plantaris muscle hypertrophy. After 5 days, muscles were excised and [<sup>3</sup>H]-2-deoxyglucose uptake assessed *ex vivo*. (A) Rate of muscle glucose uptake. (B) Percent change in glucose uptake relative to the contralateral, sham-operated control muscle. Statistical significance was defined as P<0.05 and denoted by ‘a’ vs sham-operated controls, ‘b’ vs WT/CON, and ‘c’ vs mGLUT4 HET. N=5-10 muscles/group.

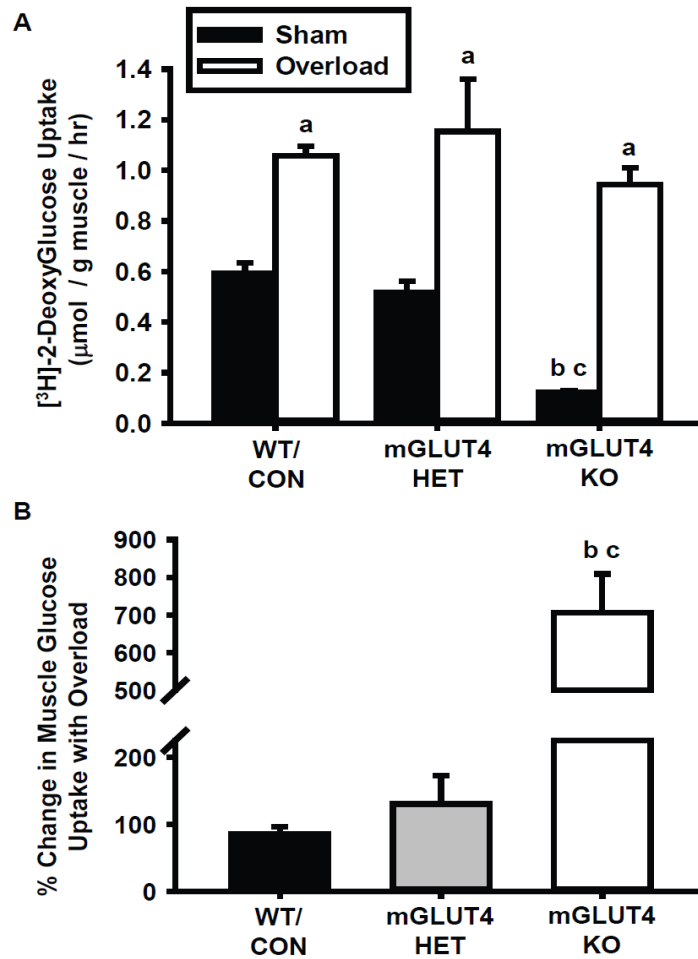

SUPPLEMENTARY DATA

**Supplementary Figure 2. Validation of commercially available GLUT antibodies for detection of specified mouse GLUT isoform.** GLUT isoform antibodies were validated using mouse tissues known to express that isoform and/or GLUT isoform overexpression samples as indicated in the figure panels. Immunoblotting conditions and representative blots are provided above.

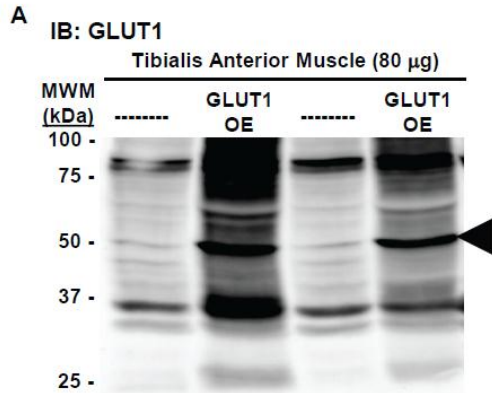

**Immunoblotting Conditions:**

**Blocking:** 5% non-fat milk in 1x TBST; 1 hr at RT

**1° antibody:** 1:2000 anti-GLUT1, Millipore (cat#AB1344), in 5% BSA in 1x TBST+0.01% NaN<sub>3</sub>; overnight at 4°C

**2° antibody:** 1:2000 anti-rabbit-HRP, ThermoScientific (cat#PI31460), in 5% BSA in 1x TBST; 1 hr at RT

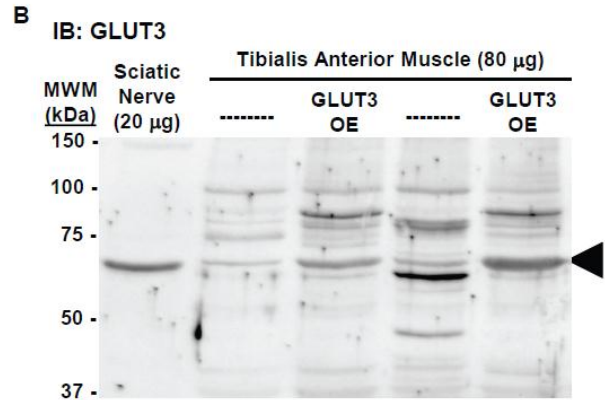

**Immunoblotting Conditions:**

**Blocking:** 5% non-fat milk in 1x TBST; 1 hr at RT

**1° antibody:** 1:2000 anti-GLUT3, Millipore (cat#AB1344), in 5% BSA in 1x TBST+0.01% NaN<sub>3</sub>; overnight at 4°C

**2° antibody:** 1:2000 anti-rabbit-HRP, ThermoScientific (cat#PI31460), in 5% BSA in 1x TBST; 1 hr at RT

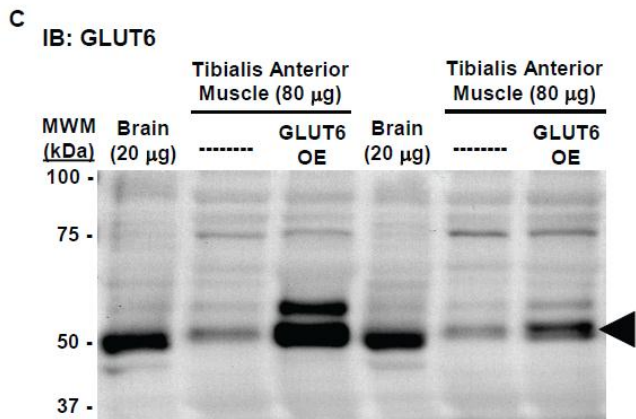

**Immunoblotting Conditions:**

**Blocking:** 5% BSA in 1x TBST; 1 hr at RT

**1° antibody:** 1:500 anti-GLUT6, Abcam (cat#ab118025), in 5% BSA in 1x TBST+0.01% NaN<sub>3</sub>; overnight at 4°C

**2° antibody:** 1:5000 anti-mouse-HRP, Millipore Corp (cat#12-349), in 5% BSA in 1x TBST; 1 hr at RT

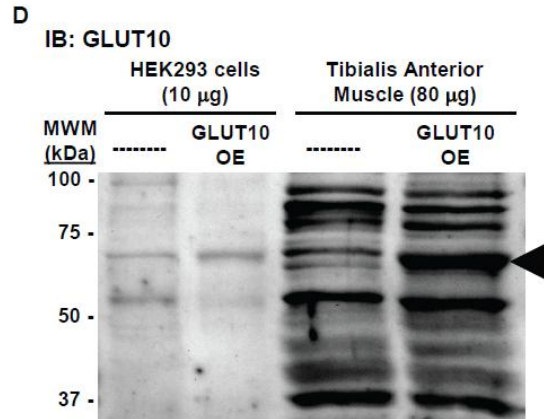

**Immunoblotting Conditions:**

**Blocking:** 5% non-fat milk in 5% BSA in 1x TBST; 1 hr at RT

**1° antibody:** 1:500 anti-GLUT10 (L-20), Santa Cruz (cat#sc-21635), in 5% BSA in 1x TBST+0.01% NaN<sub>3</sub>; overnight at 4°C

**2° antibody:** 1:5000 anti-goat-HRP, Promega Corp (cat#V8051), in 5% BSA in 1x TBST; 1 hr at RT



SUPPLEMENTARY DATA

**Supplementary Figure 3. Effects of muscle-specific loss of GLUT4 on overload-induced changes in glucose transporter isoform protein levels in male mice.** At 11-12 wks old, male wild-type/control (WT/CON), muscle-specific GLUT4 heterozygous (mGLUT4 HET), and muscle-specific GLUT4 knockout (mGLUT4 KO) mice underwent unilateral synergist ablation surgery to induce plantaris muscle hypertrophy. After 5 days, muscles were excised and processed to assess GLUT transporter isoform protein expression by immunoblot (IB) analysis. Representative blots and quantification provided above. Statistical significance was defined as  $P < 0.05$  and denoted by ‘a’ vs sham, ‘b’ vs WT/CON, ‘c’ vs mGLUT4 HET, ‘d’ genotype main effect vs WT/CON, ‘e’ genotype main effect vs mGLUT4 HET. N=4-6 muscles/group.

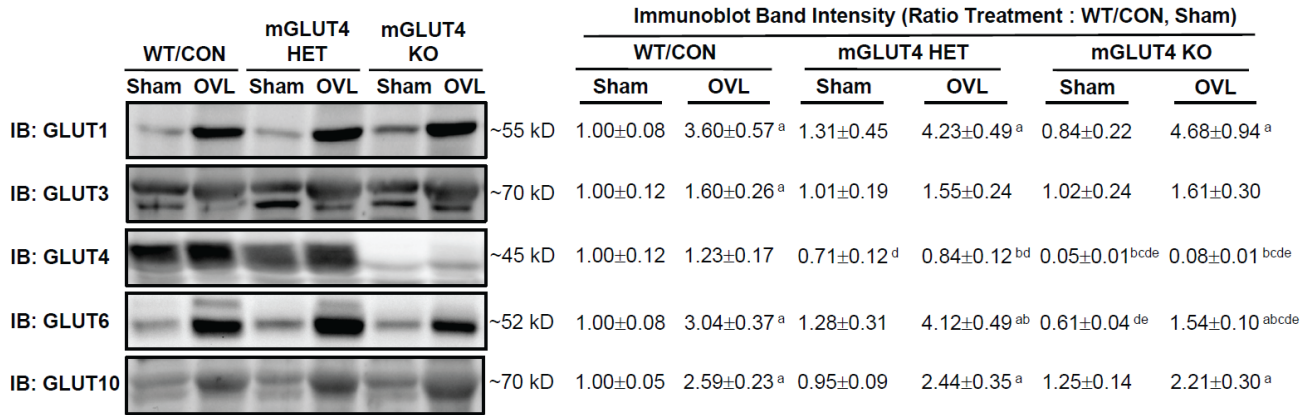

SUPPLEMENTARY DATA

**Supplementary Figure 4. Overload increases glucose uptake in mouse soleus muscle.** At 8-9 wks old, female wild-type CD-1 mice underwent unilateral synergist ablation surgery of the distal two-thirds of the gastrocnemius muscle to induce soleus muscle hypertrophy. After 5 days, muscles were excised and [<sup>3</sup>H]-2-deoxy-D-glucose uptake assessed *ex vivo*. Statistical significance was defined as P<0.05 and denoted by 'a' vs sham-operated controls. N=6 muscles/group.

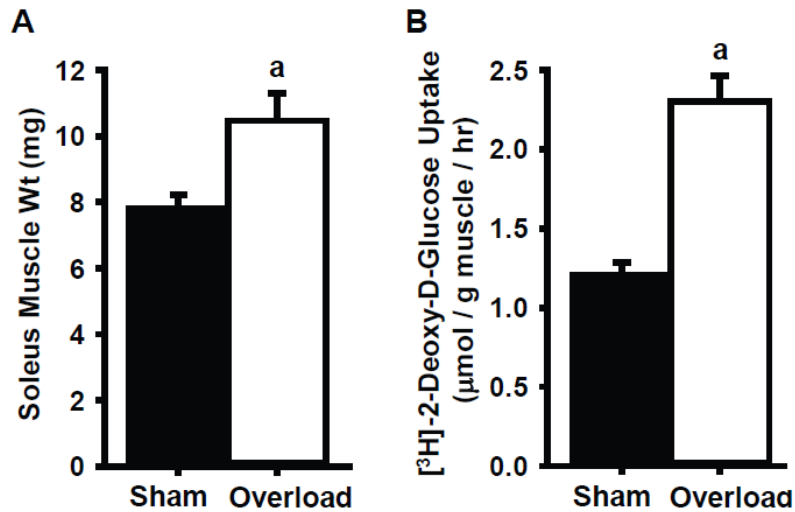

## SUPPLEMENTARY DATA

**Supplementary Figure 5. Differential effects of gender on glucose transporter (GLUT) isoform protein levels.** At 11-12 weeks old, male and female, wild-type/control (WT/CON), muscle-specific GLUT4 heterozygous (mGLUT4 HET), and muscle-specific GLUT4 knockout (mGLUT4 KO) mice underwent unilateral synergist ablation surgery to induce plantaris muscle hypertrophy. After 5 days, muscles were excised and processed to assess GLUT isoform protein levels by immunoblot (IB) analysis. (A) GLUT1; (B) GLUT3; (C) GLUT4; (D) GLUT6; (E) GLUT10. (F) Statistical significance was determined by Three-Way Analysis of Variance and Student-Newman-Keuls post-hoc analysis, and P-values provided for comparisons. Within figures, statistically significant ( $P < 0.05$ ) main effects was denoted by ‘\*’ vs. sham; ‘a’ vs. WT/CON; ‘b’ vs. mGLUT4 HET; and ‘#’ vs. female. N=4-7 muscles/group.

SUPPLEMENTARY DATA

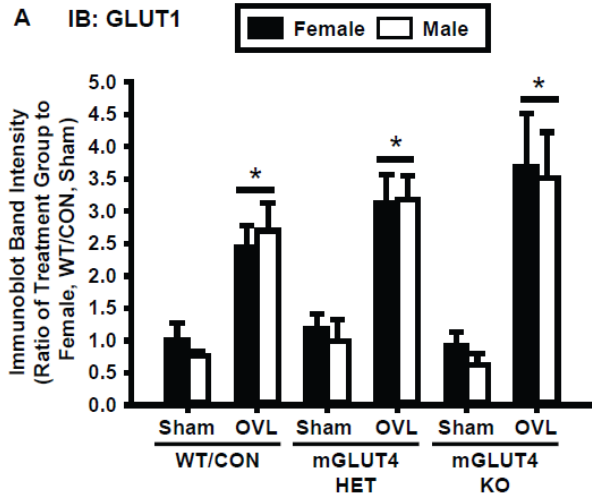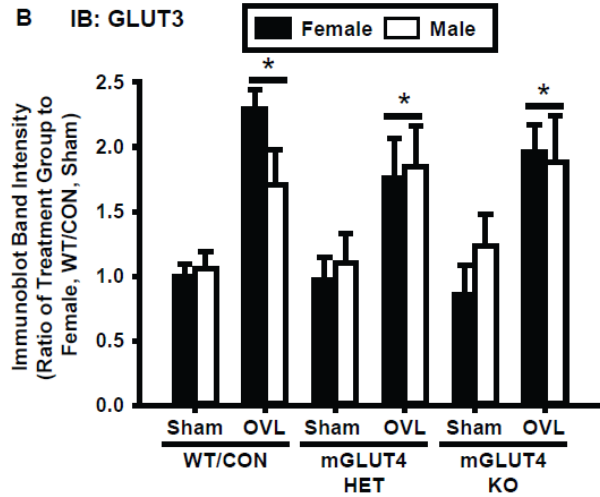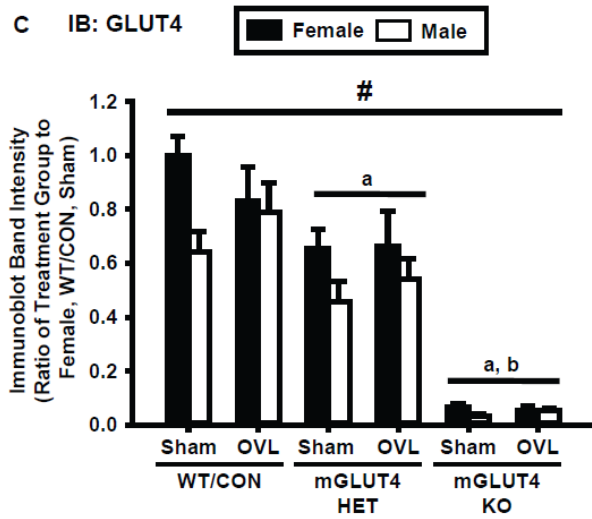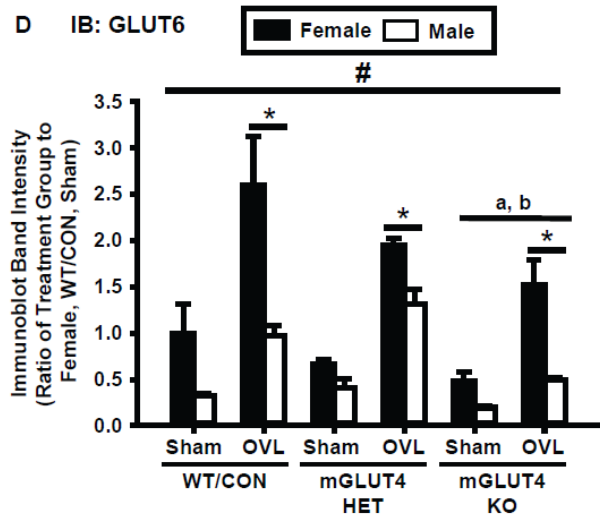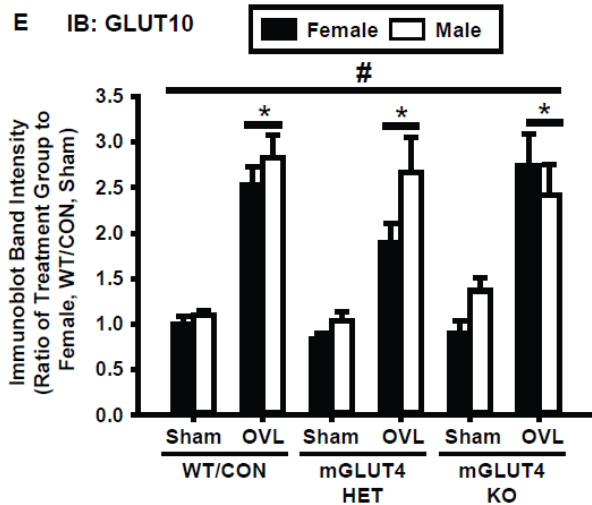

**F**

| Three Way Analysis of Variance<br>Student Newman-Keuls Post-Hoc Analysis |                               |                                      |                                         |
|--------------------------------------------------------------------------|-------------------------------|--------------------------------------|-----------------------------------------|
|                                                                          | Gender<br>(Male vs<br>Female) | Genotype<br>(WT/CON vs<br>mGLUT4 KO) | Muscle Treatmt<br>(Sham vs<br>Overload) |
| GLUT1                                                                    | P=0.691                       | P=0.276                              | P<0.001                                 |
| GLUT3                                                                    | P=0.858                       | P=0.975                              | P<0.001                                 |
| GLUT4                                                                    | P=0.019                       | P<0.001                              | P=0.804                                 |
| GLUT6                                                                    | P<0.001                       | P=0.011                              | P<0.001                                 |
| GLUT10                                                                   | P=0.049                       | P=0.978                              | P<0.001                                 |
